# Supplementary material
Source: PubMed Central journal article supplement (PMC2793361)
Supplement: mmc1.pdf [file mmc1.pdf]

Biophysical Journal, Volume 97

**Supporting Material**

**Combining laser microsurgery and finite element modeling to assess cell-level epithelial mechanics**

M. Shane Hutson, Jim Veldhuis, Xiaoyan Ma, Holley E. Lynch, P. Graham Cranston, and G. Wayne Brodland

## SUPPORTING MATERIAL

**Note S1: Correlations with the local cell geometry.** The FE model yields a wide range of recoil velocities – even when results are limited to a single angle with a specific set of boundary conditions. This wide range occurs despite a uniform viscosity and uniform cell-edge tensions. It is instead caused by local differences in cell geometry. To illustrate the geometric influences, we present a local approximation to the full finite element matrix equation. For a node at the end of a wounded edge (e.g. node A in Fig 1 of the main text), one can write an equation of dynamic equilibrium with respect to the edge direction ( $x'$ ):

$$(\eta_{1,xx} + \eta_{2,xx} + \eta_{3,xx})v_{x0} \approx \gamma(\cos\alpha + \cos\varepsilon) + \langle \sigma_{in} \rangle \delta(d_{AC} \sin\alpha + d_{AE} \sin\varepsilon)/2 \quad \text{Eqn S1.}$$

The right-hand side is the post-ablation force imbalance at node A due to tension along the two non-ablated edges and the internal stress in cell #3 (approximated by the average internal stress). The geometric parameters are defined in Fig 1 of the main text. The left-hand side is a viscous force where  $\eta_{m,xx}$  is the effective drag coefficient for motion along  $x'$  due to cell  $m$ . For each cell, the drag coefficient is calculated on the basis of two orthogonal systems of dashpots (1). These dashpot systems define a  $2 \times 2$  damping matrix in the cell's principle coordinate system

$$\eta = \frac{4\pi a \delta \mu}{n} \begin{bmatrix} \sqrt{I_{\min}/I_{\max}} & 0 \\ 0 & \sqrt{I_{\max}/I_{\min}} \end{bmatrix} \quad \text{Eqn S2}$$

where  $a = 0.682$  is an empirical constant,  $n$  is the number of nodes in the cell and  $I_{\min}$  and  $I_{\max}$  are the cell's principle moments of inertia. To find  $\eta_{m,xx}$ , the damping matrix is rotated into the frame of the ablated edge ( $R^T \eta R$ ). A primary impact of Eqn S2 is to make  $\eta_{m,xx}$  smaller when a cell is extended along  $x'$ . For Eqn S1, we take the first order approximation in which only node A moves and only in the  $x'$ -direction.

Eqn S1 can be recast in dimensionless parameters as:

$$G_{xx} v_0 \approx C_\gamma + \langle \Sigma_{in} \rangle C_\Sigma \quad \text{where} \quad G_{xx} = (\eta_{1,xx} + \eta_{2,xx} + \eta_{3,xx})/(2\mu\delta) \quad \text{Eqn S3}$$

$$C_\gamma = \cos\alpha + \cos\varepsilon$$

$$C_\Sigma = (\chi_{AC} \sin\alpha + \chi_{AE} \sin\varepsilon)/4$$

$G_{xx}$ ,  $C_\gamma$  and  $C_\Sigma$  respectively capture the influence of cell geometry on viscous damping, the imbalance of cell-edge tensions and the imbalance of internal cell stress.  $v_0$  always increases with  $C_\gamma$  and decreases with  $G_{xx}$  (Fig S1). Both dependencies reflect increases in  $v_0$  as cells become more elongated in the direction parallel to the ablated edge – which decreases each  $\eta_{m,xx}$  and makes the triple-junction angles more acute. The dependence of  $v_0$  on  $C_\Sigma$  is much weaker, and is not readily apparent until one includes the viscous damping effects (Fig S1,  $v_0$  versus  $C_\Sigma / G_{xx}$ ). When all three effects are included, the local approximation accounts for 50-60% of the variance in  $v_0$ .

The variation in  $G_{xx}$  has a critical influence on recoil velocity that is often overlooked. For example, Rauzi et al modeled the geometry dependence of  $v_0$  based solely on the imbalance of cell edge tensions in an idealized geometry of stretched hexagonal cells (2). They assumed uniform viscous damping that canceled out of  $v_0$  comparisons. Although they attributed

differences between model and experiments to cell-edge elasticity, we estimate that  $G_{xx}$  should actually decrease by a factor of  $\sqrt{3}$  over the range of cell shapes considered – accounting for roughly half of their observed differences.

1. Brodland, G. W., D. Viens, and J. H. Veldhuis. 2007. A new cell-based FE model for the mechanics of embryonic epithelia. *Comp. Meth. Biomech. Biomed. Engr.* 10:121-128.
2. Rauzi, M., P. Verant, T. Lecuit, and P. F. Lenne. 2008. Nature and anisotropy of cortical forces orienting *Drosophila* tissue morphogenesis. *Nature Cell Biology* 10:1401-1410.

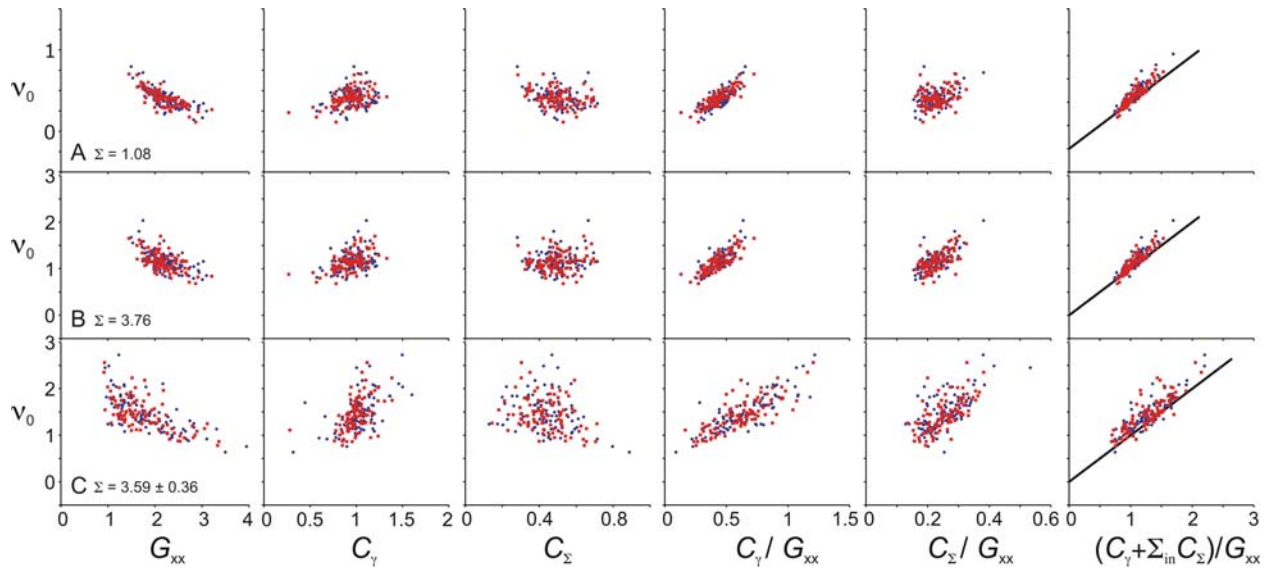

**FIGURE S1.** Correlations between the recoil velocity and local cell geometry. Each row of graphs corresponds to a different far-field stress (as noted). The geometric factors  $G_{xx}$ ,  $C_\gamma$  and  $C_\Sigma$  are defined in Eqn S3. The last plot on each row compares the simulated  $v_0$  to that predicted based on Eqn S3 and the local cell geometry (solid line is  $y = x$ ).

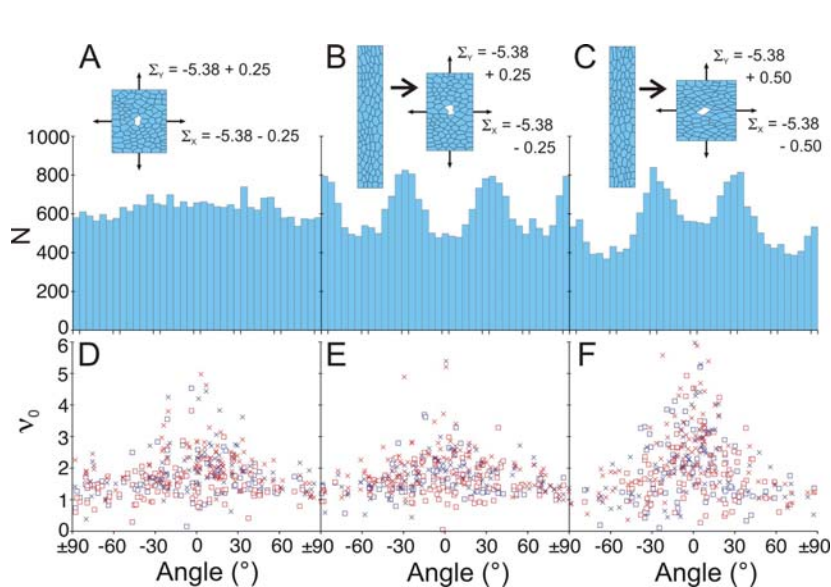

**FIGURE S2.** Dependence of initial recoil velocity on direction under anisotropic external stress. **(A-C)** Histograms of cell-edge orientations. The external stresses are as shown for the sample cell patches. Note that  $\Sigma < 0$  implies cell edges that are under compression. For **(B,C)**, the cell patch was previously stretched in the vertical direction. **(D-F)** Initial recoil velocities versus direction for cell-edge ( $\square$ ) and cell-center ( $\times$ ) wounds. For cell-edge wounds, the tracked direction was always parallel to the ablated edge.

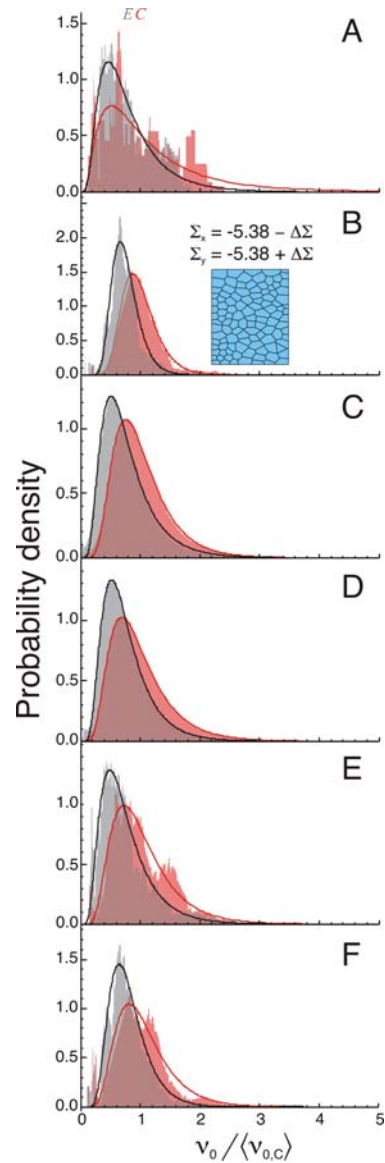

**FIGURE S3.** Comparison of the  $v_0$ -distributions for experiments **(A)** and simulations **(B-F)** for late dorsal closure when  $\Sigma < 0$ , i.e. cell edges are under compression: **(B)** best-matching uniform simulations; **(C)** simulations with inter-embryo lognormal variations in  $|\Sigma|$ ; **(D)** simulations with inter-embryo lognormal variations in all  $|force/viscosity|$  ratios; **(E)** simulations with intra-embryo lognormal variations in viscosity; **(F)** non-equilibrium simulations with intra-embryo lognormal variations in the interfacial tension magnitude. Cell-center wounds are in red, cell-edge wounds in grey.  $\langle v_{0,C} \rangle$  and  $\langle v_{0,E} \rangle$ , are marked by the red *C* and grey *E* respectively. The sample cell patch in **(B)** shows the cell geometry after equilibration at the noted stress  $\Sigma_{x,y}$ .

**Table S1.** Viscoelastic parameters used in the simulations presented in Figure 7.

| Viscoelastic rods along cell edges only                |         |                        |              |              |                       |                       |
|--------------------------------------------------------|---------|------------------------|--------------|--------------|-----------------------|-----------------------|
| Fit to:                                                | $R^2$   | $\Phi\Psi_M$           | $\Phi\xi_M$  | $\Phi\Psi_K$ | $\Phi\xi_K$           |                       |
| mean – st. dev.                                        | .999242 | 1750                   | 767          | 27.5         | 0                     |                       |
| mean                                                   | .999653 | 750                    | 349          | 10.0         | 0                     |                       |
| mean + st. dev.                                        | .999447 | 500                    | 174          | 6.25         | 0                     |                       |
| Viscoelastic rods as a pre-stressed intracellular mesh |         |                        |              |              |                       |                       |
| Fit to:                                                | $R^2$   | $\Sigma_{\text{mesh}}$ | $\Phi\Psi_M$ | $\Phi\xi_M$  | $\Phi\Psi_K$          | $\Phi\xi_K$           |
| mean – st. dev.                                        | .999256 | 3.27                   | 1.00         | 0.506        | $2.50 \times 10^{-3}$ | $1.74 \times 10^{-2}$ |
| mean                                                   | .999651 | 3.16                   | 0.625        | 0.251        | $1.25 \times 10^{-3}$ | $1.74 \times 10^{-2}$ |
| mean + st. dev.                                        | .999474 | 2.90                   | 0.375        | 0.293        | $1.25 \times 10^{-3}$ | $1.74 \times 10^{-2}$ |
| Double-wound simulation                                |         | 3.75                   | 0            | 0            | 0.497                 | $1.34 \times 10^{-2}$ |
